# Supplementary material for: Clinical Features and Risk Factors of Active Tuberculosis in Patients with Behçet’s Disease
Source: Hindawi journal article supplement (doi:10.1155/2020/2528676), 2020-01-01
Supplement: f1 [file 2528676.f1.pdf]

## Supplement materials

Table S1. Diagnosis and categorization criteria for TB

| Diagnosis                            | Criteria                                                                                                                                                                                                                                                                                                                                                                                                                                                                                                                                                                                             |
|--------------------------------------|------------------------------------------------------------------------------------------------------------------------------------------------------------------------------------------------------------------------------------------------------------------------------------------------------------------------------------------------------------------------------------------------------------------------------------------------------------------------------------------------------------------------------------------------------------------------------------------------------|
| Active tuberculosis (ATB)            | <ol style="list-style-type: none"> <li>1) Symptoms related to TB: cough, expectoration, fever, night sweating, weight loss, etc.</li> <li>2) With or without laboratory results or radiological features supporting TB diagnosis.</li> <li>3) Respond to anti-TB treatment.</li> <li>4) Pathogenic evidence of <i>Mycobacterium tuberculosis</i> infection: fast-acid staining, microbiological culture, X-pert, etc.</li> </ol> <p>1+4 or 1+2+3 indicates ATB diagnosis, those with 4 were considered microbiologically confirmed ATB while those without were considered clinically diagnosed.</p> |
| Latent tuberculosis infection (LTBI) | <ol style="list-style-type: none"> <li>1) No clinical or radiological features of ATB.</li> <li>2) No history or radiological features of previous TB.</li> <li>3) Positive T-SPOT.TB results.</li> </ol> <p>1+2+3 indicates LTBI diagnosis.</p>                                                                                                                                                                                                                                                                                                                                                     |
| Previous tuberculosis (PTB)          | <ol style="list-style-type: none"> <li>1) No clinical or radiological features of ATB</li> <li>2) Previous history of TB.</li> <li>3) Radiological features suggestive of previous TB.</li> </ol> <p>1 + 2 or 3 indicates PTB diagnosis.</p>                                                                                                                                                                                                                                                                                                                                                         |

Table S2. The diagnosis of ATB

| Case | Sex/Age | Microbiologically confirmed | The diagnosis was made according to                                                                                                                                                                                                                 | Infection site               |
|------|---------|-----------------------------|-----------------------------------------------------------------------------------------------------------------------------------------------------------------------------------------------------------------------------------------------------|------------------------------|
| 1    | F/24    | Yes                         | Sputum culture                                                                                                                                                                                                                                      | Lung                         |
| 2    | M/48    | Yes                         | Sputum acid fast staining                                                                                                                                                                                                                           | Lung                         |
| 3    | M/30    | Yes                         | Bone marrow culture                                                                                                                                                                                                                                 | Lung, ribs, bone marrow      |
| 4    | M/23    | Yes                         | Sputum culture                                                                                                                                                                                                                                      | Lung                         |
| 5    | M/56    | No                          | History of untreated ATB, symptoms (fever, EN), response to anti-TB treatment                                                                                                                                                                       | Lymph node                   |
| 6    | M/33    | No                          | Symptoms (fever, EN, cough, expectoration), radiological findings (chest CT revealed bilateral multiple pulmonary tubercles and mediastinal lymphadenopathy), response to anti-TB treatment                                                         | Lung                         |
| 7    | M/34    | No                          | Symptoms (fever, night sweating, pharyngalgia, oral and lingual ulcers, epiglottidema), response to anti-TB treatment                                                                                                                               | Larynx                       |
| 8    | F/56    | No                          | Symptoms (abdominal pain, diarrhea or constipation, cough, expectoration, night sweating), endoscopic findings (colonoscopy revealed multiple longitudinal and oval ulcers in the descending colon and upper rectum), response to anti-TB treatment | Lung, gastrointestinal tract |

---

|    |      |    |                                                                                                                                                                                                                                                                     |                        |
|----|------|----|---------------------------------------------------------------------------------------------------------------------------------------------------------------------------------------------------------------------------------------------------------------------|------------------------|
| 9  | F/38 | No | Symptoms (fever, night sweating, chest pain), radiological findings (chest CT revealed a left-sided mass lesion and pleural effusion), response to anti-TB treatment                                                                                                | Lung, peritoneum       |
| 10 | F/48 | No | Symptoms (fever, night sweating, EN, back pain), radiological findings (MRI revealed abnormal signals in the body of vertebrae L5 to S1, with destructed structure of intervertebral discs and stenosis of the intervertebral space), response to anti-TB treatment | Bone and joint         |
| 11 | M/13 | No | Symptoms (fever, abdominal pain), endoscopic findings (colonoscopy showed multiple erosional ulcers with deformation and stenosis of the ileocecal valve), response to anti-TB treatment                                                                            | Gastrointestinal tract |
| 12 | M/23 | No | Symptoms (fever), radiological findings (chest CT revealed bilateral pulmonary miliary tubercles and patches), response to anti-TB treatment                                                                                                                        | Lung                   |
| 13 | F/32 | No | Symptoms (oral and genital ulcers, uveitis, neurological symptoms), radiological findings (chest CT revealed a tubercle with cavity and surrounding patches in the right upper lobe), response to anti-TB treatment                                                 | Lung                   |
| 14 | F/48 | No | History of untreated ATB, symptoms (fever, left cervical lymphadenopathy with fistula formation), response to anti-TB treatment                                                                                                                                     | Lung                   |
| 15 | M/29 | No | Symptoms (fever, fatigue, cough, expectoration), radiological findings (chest CT revealed patches in the right upper lobe), response to anti-TB treatment                                                                                                           | Lung                   |

---

---

|    |      |    |                                                                                                                                                                                                                                                               |                   |
|----|------|----|---------------------------------------------------------------------------------------------------------------------------------------------------------------------------------------------------------------------------------------------------------------|-------------------|
| 16 | M/34 | No | Symptoms (fever, fatigue, night sweating, weight loss, EN), radiological findings (chest CT revealed bilateral multiple patches and cords; echocardiogram showed pericardial coarctation and cellulosic pericardial exudation), response to anti-TB treatment | Lung, pericardium |
| 17 | F/15 | No | Symptoms (fever, EN, cervical lymphadenopathy), radiological findings (chest CT showed multiple tubercle and cords in the right lower lobe, and multiple calcified hilar and mediastinal lymphadenopathy), response to anti-TB treatment                      | Lung              |
| 18 | M/40 | No | Symptoms (cough), radiological findings (chest CT revealed bilateral multiple ground glass opacities and cords-like shadows), response to anti-TB treatment                                                                                                   | Lung              |
| 19 | M/44 | No | Symptoms (fever, EN), radiological findings (chest CT revealed bilateral military tubercles), response to anti-TB treatment                                                                                                                                   | Lung              |
| 20 | M/43 | No | History of untreated ATB, symptoms (oral and genital ulcers, folliculitis-like rashes), respond to anti-TB treatment                                                                                                                                          | Unidentified      |
| 21 | F/49 | No | Symptoms (fever, fatigue, night sweating, weight loss, EN), radiological findings (chest CT revealed bilateral multiple patches, ground glass opacities, consolidation and cords-like shadows with partial calcification), response to anti-TB treatment      | Lung              |

---

EN: erythema nodosum
